# Supplementary material for: Inhibitory effect of trans-ferulic acid on proliferation and migration of human lung cancer cells accompanied with increased endogenous reactive oxygen species and β-catenin instability
Source: PubMed Central journal article supplement (PMC5045596; doi:10.1186/s13020-016-0116-7), 2016-10-01

**Additional file 2.**

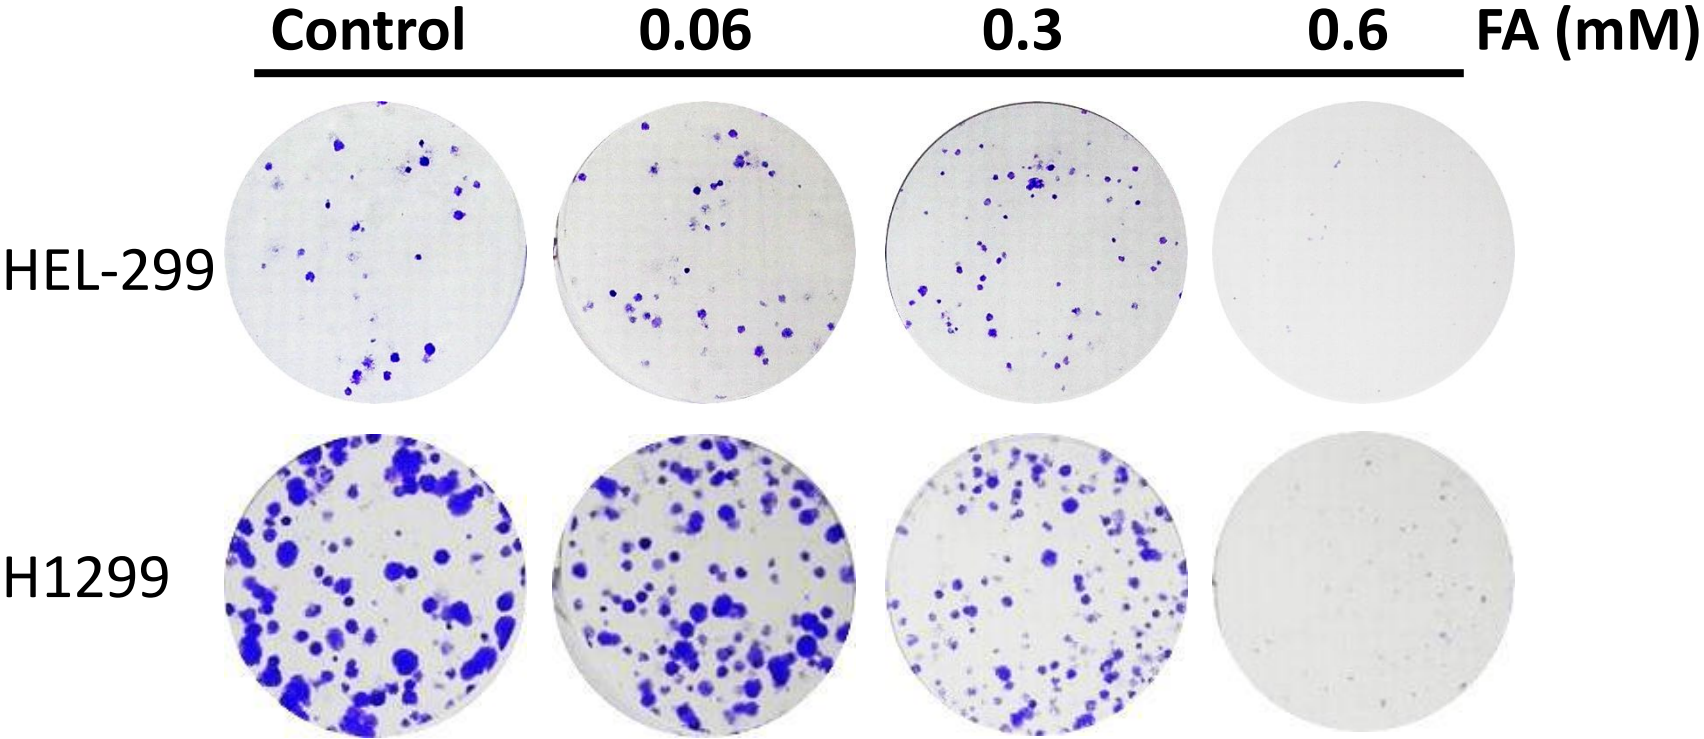

Supplement: 13020_2016_116_MOESM2_ESM.pdf [file 13020_2016_116_MOESM2_ESM.pdf]
